# Supplementary material
Source: PubMed Central journal article supplement (PMC5985954)
Supplement: NIHMS76932-supplement-Supplementary_information.pdf [file NIHMS76932-supplement-Supplementary_information.pdf]

## **Identifying and exploiting genes that potentiate the evolution of antibiotic resistance**

Danna Gifford<sup>§</sup>, Victoria Furió<sup>§</sup>, Andrei Papkou, Tom Vogwill, Antonio Oliver and R. Craig MacLean

**Table S1: Mutation rate estimates for the 8 strain used.** Mutation rates were estimated by Luria-Delbrück fluctuation test using the  $p_0$  method.

|                               | Mean density       | Cultures | No. without mutants | Proportion ( $p_0$ ) | $-\ln(p_0)$ | Mutation rate (95% upper bound) |
|-------------------------------|--------------------|----------|---------------------|----------------------|-------------|---------------------------------|
| <i>P. aeruginosa</i> PAO1     | $3.65 \times 10^6$ | 480      | 367                 | 0.765                | 0.268       | $7.36 \times 10^{-8}$           |
| <i>P. fluorescens</i> Pf0-1   | $5.20 \times 10^6$ | 480      | 421                 | 0.877                | 0.131       | $2.52 \times 10^{-8}$           |
| <i>P. fluorescens</i> SBW25   | $6.20 \times 10^6$ | 480      | 465                 | 0.969                | 0.032       | $5.12 \times 10^{-9}$           |
| <i>P. fulva</i> CCUG 12573    | $4.10 \times 10^7$ | 480      | 168                 | 0.350                | 1.050       | $2.56 \times 10^{-8}$           |
| <i>P. mendocina</i> CCUG 1781 | $1.30 \times 10^7$ | 480      | 186                 | 0.388                | 0.948       | $7.29 \times 10^{-8}$           |
| <i>P. protegens</i> Pf-5      | $2.80 \times 10^6$ | 480      | 368                 | 0.767                | 0.266       | $9.49 \times 10^{-8}$           |
| <i>P. putida</i> KT2440       | $1.70 \times 10^6$ | 480      | 380                 | 0.792                | 0.234       | $1.37 \times 10^{-7}$           |
| <i>P. stutzeri</i> ATCC 17588 | $8.50 \times 10^6$ | 480      | 49                  | 0.102                | 2.282       | $2.68 \times 10^{-7}$           |

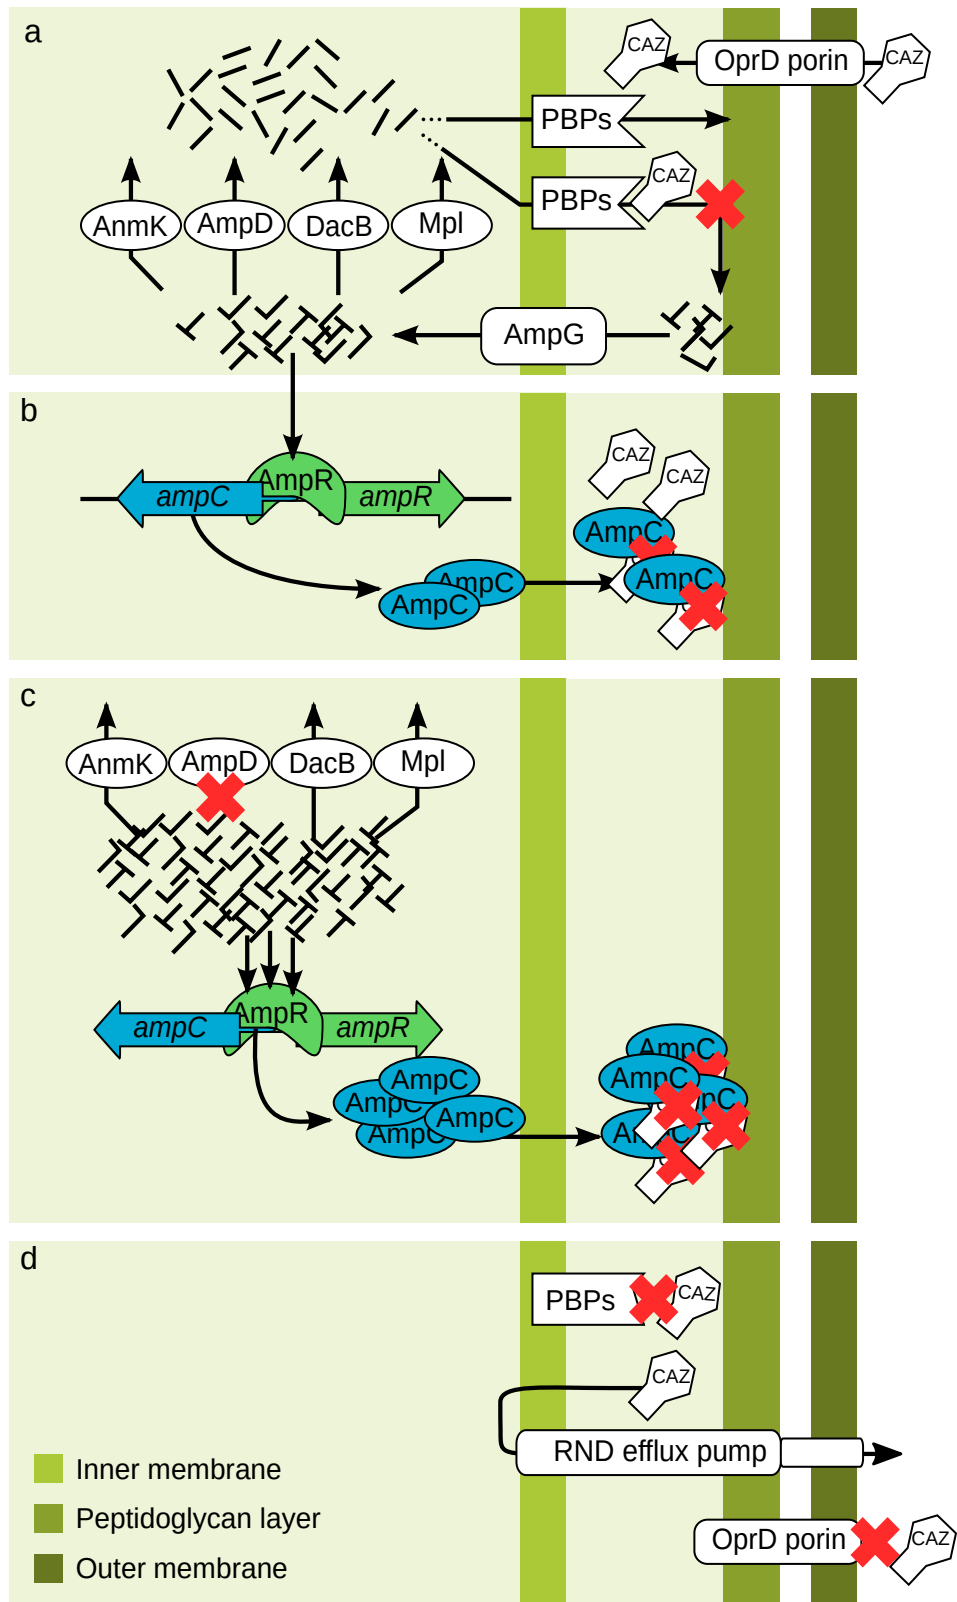

**Figure S1: Mechanisms of ceftazidime action and resistance** **a** Ceftazidime (CAZ) enters into the periplasm by diffusion through outer membrane porins. CAZ inhibits penicillin binding proteins (PBPs), resulting in an increased accumulation of peptidoglycan catabolites. **b** The accumulation of peptidoglycan catabolites in the cytoplasm convert the AmpR transcription factor into an activator of *ampC* expression. AmpC is secreted into the periplasm, where it hydrolyses CAZ. **c** Loss of function mutations in peptidoglycan recycling genes lead to increased resistance by increasing *ampC* expression. **d** Resistance can also be caused by structural alterations to PBPs, elevated expression of RND efflux pumps, or mutations in porin genes.

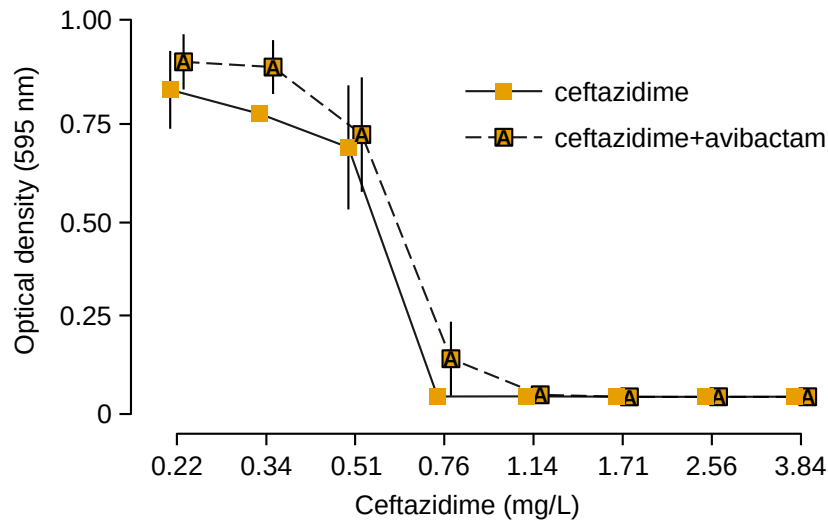

**Figure S2: Ceftazidime and ceftazidime+avibactam MIC in *Pseudomonas aeruginosa* PAO1.**

The addition of avibactam increased the MIC of ceftazidime from 0.76 mg/L to 1.14 mg/L.

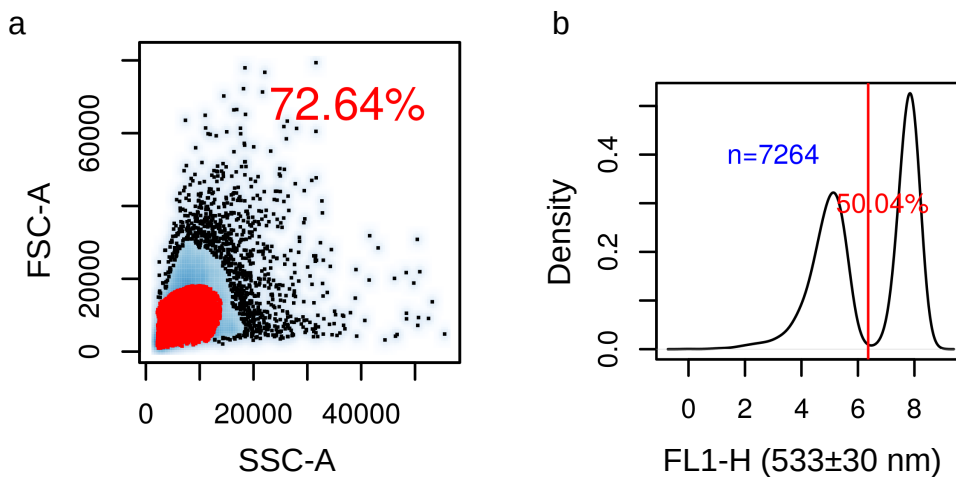

**Figure S3: Flow cytometry gating strategy.** **a** Around 10000 events were acquired per sample. The gating procedure described below would typically preserve 7000-8000 events for subsequent analysis. During data acquisition, a lower cut off was set at 10,000 for FSC-H and at 8000 for SSC-H. In the gating pipeline, the events were automatically gated on size/shape by retaining the cells within 2 standard deviations around the median in the bivariate normal distribution of FSC-A and SSC-A ("norm2Filter" from flowCore package, red area). **b** A k-means clustering algorithm was applied on fluorescence intensity FL1-H to differentiate YFP-expressing versus non-fluorescent cells ("kmeansFilter" from flowCore package, red horizontal bar). For each antibiotic concentration, we ensured that YFP-expressing strain could be well separated from non-fluorescent strains by overlaying non-mixed controls (overlap is usually less than 2% of the cells).
